# Supplementary material for: MODEL ATMOSPHERES OF THE EARLY SPECTRAL TYPE STARS. PART II.
Source: HighWire-hosted journal article supplement (doi:10.1136/bmjquality.u207938.w3198), 1969-01-01
Supplement: ds6143.pdf [file ds6143.pdf]

## Acute Kidney Injury: The Kidney5 Care Bundle

[Please use as soon as AKI identified]

| Initial Assessment using the ABCDE approach, respond to the Early Warning Score, and specify an appropriate escalation plan |                                                                                                                                                                                                                                                                                                                                                                                                                                                                                       | Time Done | Reason Not Done |
|-----------------------------------------------------------------------------------------------------------------------------|---------------------------------------------------------------------------------------------------------------------------------------------------------------------------------------------------------------------------------------------------------------------------------------------------------------------------------------------------------------------------------------------------------------------------------------------------------------------------------------|-----------|-----------------|
| 1. <b>S</b> epsis                                                                                                           | <ul style="list-style-type: none"> <li>Treat on Sepsis6 Pathway if criteria present + Assess 3,4,5 below</li> </ul>                                                                                                                                                                                                                                                                                                                                                                   |           |                 |
| 2. <b>H</b> ypovolaemia                                                                                                     | <ul style="list-style-type: none"> <li>Restore haemodynamic status               <ul style="list-style-type: none"> <li>IV crystalloid bolus (0.9% Saline or Hartmann's solution 500ml over 15mins; 250ml if h/o cardiac failure; use 0.9% saline if <math>K^+ &gt; 5.5</math>mmol/L)</li> <li>Assess and repeat according to clinical response</li> <li>If oliguric despite adequate fluid resuscitation, match urine output and monitor for pulmonary oedema</li> </ul> </li> </ul> |           |                 |
| 3. <b>O</b> bstruction                                                                                                      | <ul style="list-style-type: none"> <li>Organise ultrasound of renal tract based on assess from history, physical examination and the following:               <ul style="list-style-type: none"> <li>Suspected pyonephrosis (within 6 hrs)</li> <li>No identified cause of AKI ( within 24 hrs)</li> <li>Identified cause of AKI: USS not mandatory</li> </ul> </li> </ul>                                                                                                            |           |                 |
| 4. <b>U</b> rine Analysis                                                                                                   | <ul style="list-style-type: none"> <li>Perform and document IN ALL patients AS SOON AS AKI identified: Interpret in clinical context.</li> <li>AKI with no clear cause + haematuria and proteinuria with no urosepsis or catheterisation: Consider autoimmune causes</li> </ul>                                                                                                                                                                                                       |           |                 |
| 5. <b>T</b> oxins                                                                                                           | <ul style="list-style-type: none"> <li>Review Medications: <b>Avoid</b> (nephrotoxins) and <b>Adjust</b> (dose of drugs with renal excretion)</li> <li>Other Toxins: Consider Myeloma, Rhabdomyolysis, Haemolytic Uraemic Syndrome , Malignant Hypertension</li> </ul>                                                                                                                                                                                                                |           |                 |

Document and Treat Cause(s): \_\_\_\_\_ / \_\_\_\_\_ / \_\_\_\_\_

Specify Monitoring Frequency:

Clinical

Urine Output

Investigations

### Treat Complications of AKI

- **Hyperkalaemia** ( $K > 6.0$ mmol/L): 10ml 10% calcium gluconate if ECG changes;  $K > 6.5$ mmol/L: Insulin 10 IU in 50ml of 50% dextrose over 15 mins with salbutamol 2.5-5mg nebulised.
- Refer if persistent ( $K > 6.0$ mmol/L) after medical treatment. \* Refer early if oliguric hyperkalaemia.
- Consider escalation, where appropriate, in patients with airway, breathing, circulation instability after appropriate initial measures.
- **Acidosis**: Hyperkalaemic with no fluid overload (250-500ml 1.26%  $\text{NaHCO}_3$ ). Do not use if in pulmonary oedema.
- **Fluid overload**: Loop diuretics not indicated. Seek renal or ICU advice. May be considered if patient waiting for dialysis develops fluid overload.

### Referral Criteria

- AKI Stage III
- Persistent Oliguria and/or rising creatinine despite having completed Kidney5 measures
- Complications refractory to medical Rx.
- AKI plus
  - Absence of defined cause
  - Systemic features e.g. rash, arthralgia
  - Paraprotein
  - Haemolysis / thrombocytopenia
  - Poisoning

Signed:

Date:

Name / Designation /  
Bleep

**PATIENT ID LABEL**
